# Supplementary material
Source: publisher figshare collection journal article supplement (https://acs.figshare.com/ndownloader/files/5085862)
Supplement: Supplementary file 1 [file 5085862]

## Supporting Information

### Colorimetric Thermometer from Graphene Oxide Platform Integrated with Red, Green, and Blue Emitting, Responsive Block Copolymers

*Junhyuk Lee, Hyunseung Yang, Chan Ho Park, Han-Hee Cho, Hongseok Yun, and Bumjoon J. Kim\**

Department of Chemical and Biomolecular Engineering, Korea Advanced Institute of Science and Technology (KAIST), Daejeon, 305-701, Republic of Korea

\*E-mail: [bumjoonkim@kaist.ac.kr](mailto:bumjoonkim@kaist.ac.kr)

### Table of Contents

| <b>Supplementary Figure S1-6</b>                                                             | <b>pages</b> |
|----------------------------------------------------------------------------------------------|--------------|
| ■ Temperature-dependent optical transmittances of P27-B, P32-G and P39-R in aqueous solution |              |
| ■ PL spectra of P27-B, P32-G and P39-R                                                       |              |
| ■ ATR-FTIR spectra of pristine GO, BCP-GO, P27-B, P32-G and P39-R                            |              |
| ■ TGA curves of pristine GO, BCP-GO, P27-B, P32-G and P39-R                                  |              |
| ■ ATR-FTIR spectra of pristine GO, BCP-GO, P27-B, P32-G and P39-R                            |              |
| ■ Optical microscopy images of BCP-GO in water-in-toluene emulsions                          |              |
| <br><b>Supplementary Table S1</b>                                                            |              |
| ■ Fluorescence lifetime decay of BCP-GO                                                      |              |

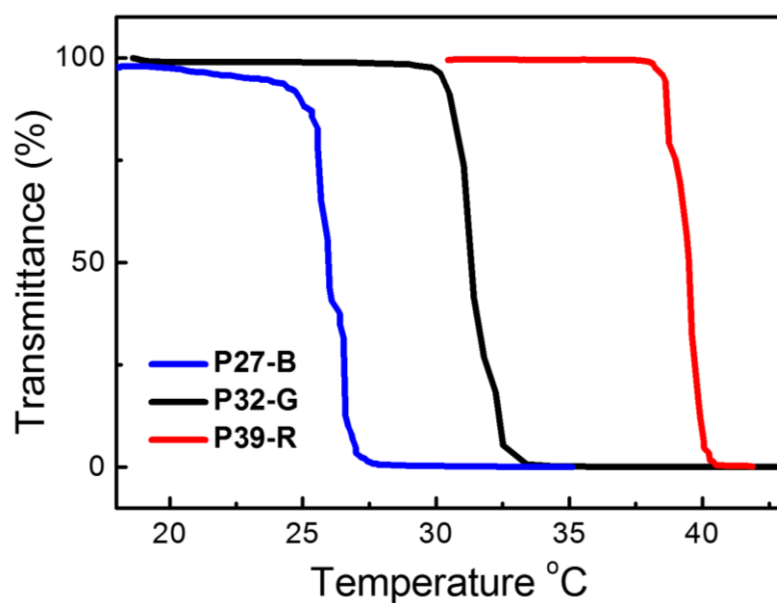

**Figure S1.** Temperature-dependent optical transmittances of P27-B, P32-G and P39-R in aqueous solution (0.5 w/v%)

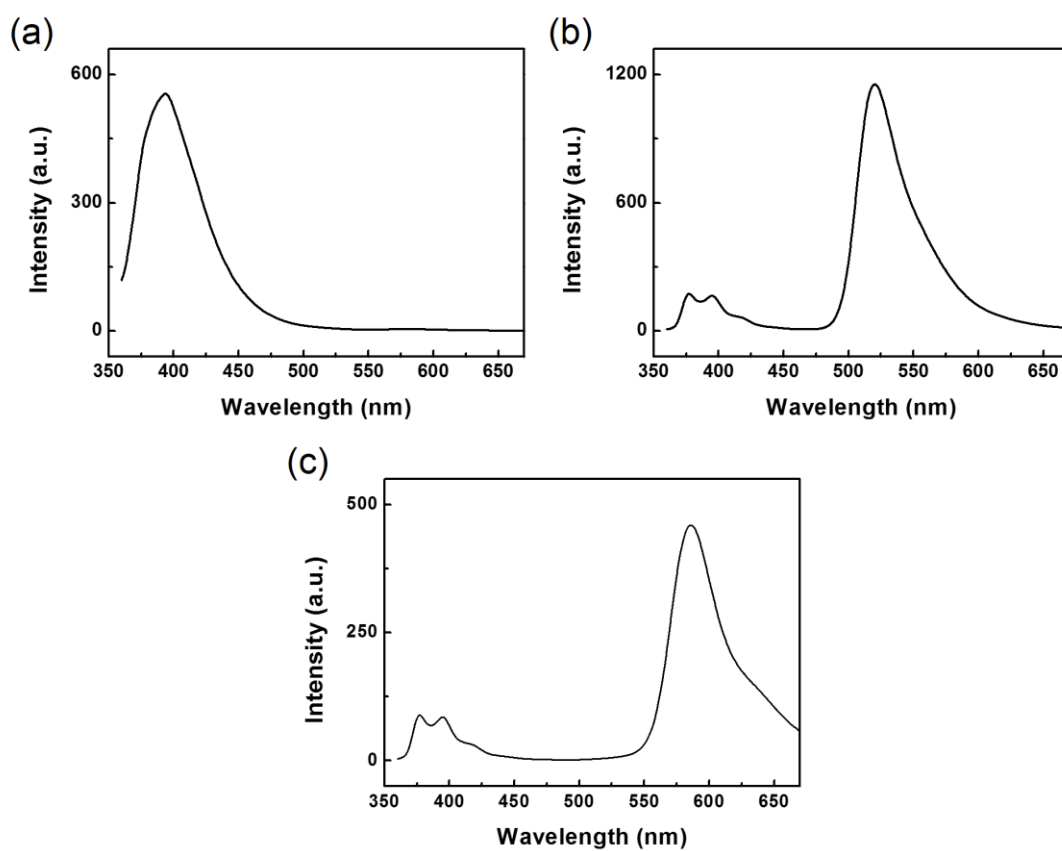

**Figure S2.** PL spectra of (a) P27-B, (b) P32-G and (c) P39-R. PL measurements were performed at 10 mg/ml under irradiation at 350 nm.

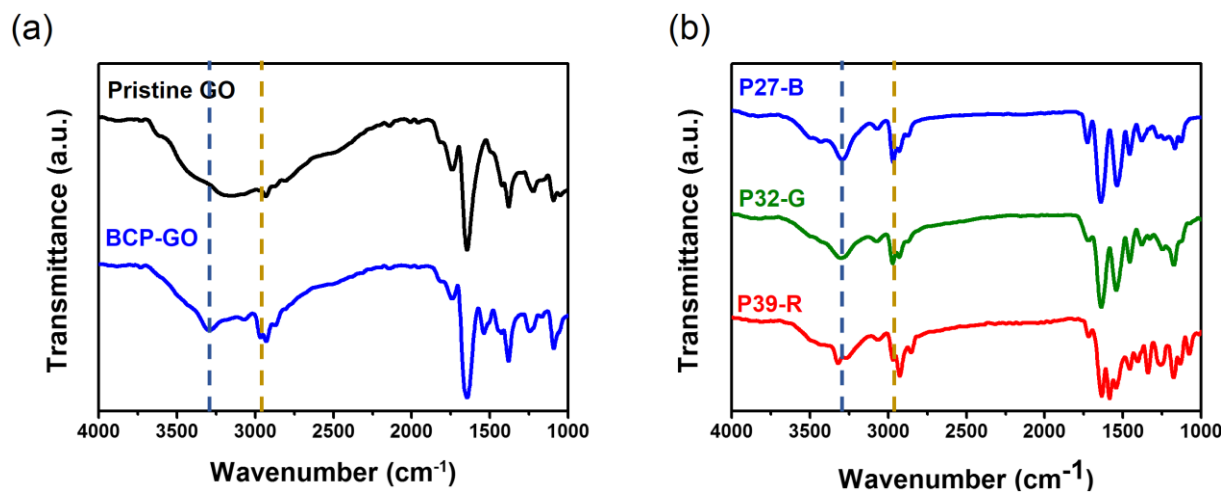

**Figure S3.** ATR-FTIR spectra of (a) pristine GO, BCP-GO, (b) P27-B, P32-G and P39-R

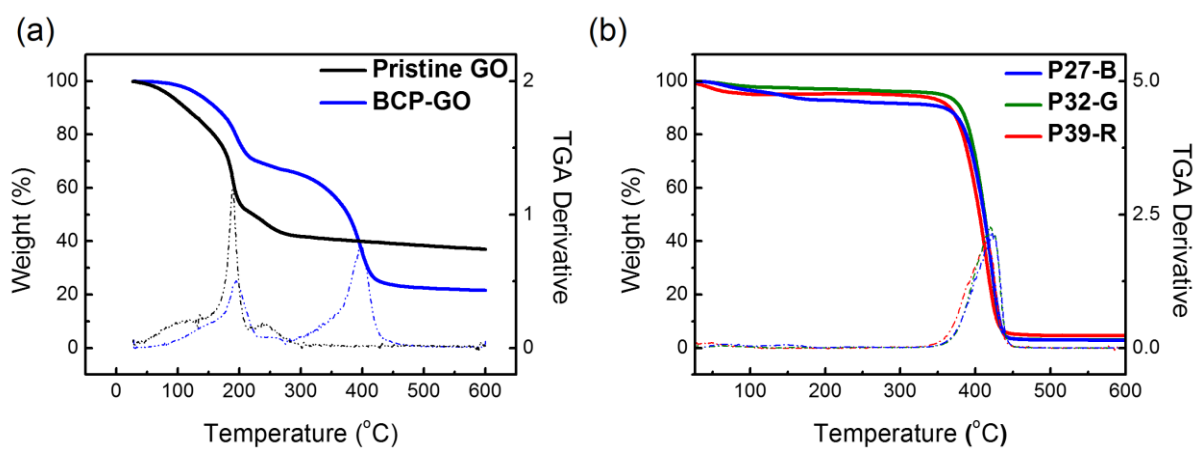

**Figure S4.** TGA curves of (a) pristine GO, BCP-GO, (b) P27-B (Blue), P32-G (Green) and P39-R (Red)

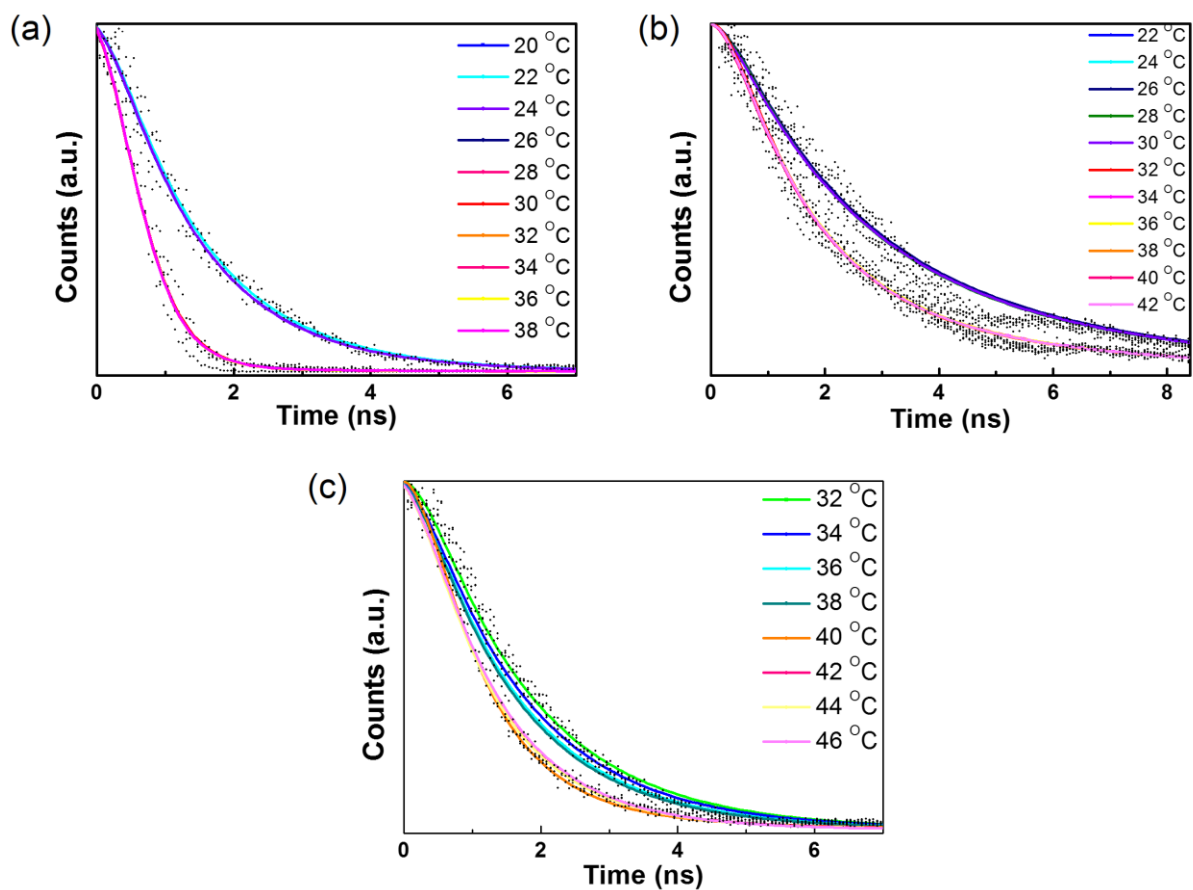

**Figure S5.** Time-resolved fluorescence (TRF) spectra of BCP-GO as function of temperature: TRF was measured for the BCP-GO with filtering (a) 393 nm for blue emission, (b) 518 nm for green emission and (c) 585 nm for red emission. BCP-GO was irradiated at 370 nm

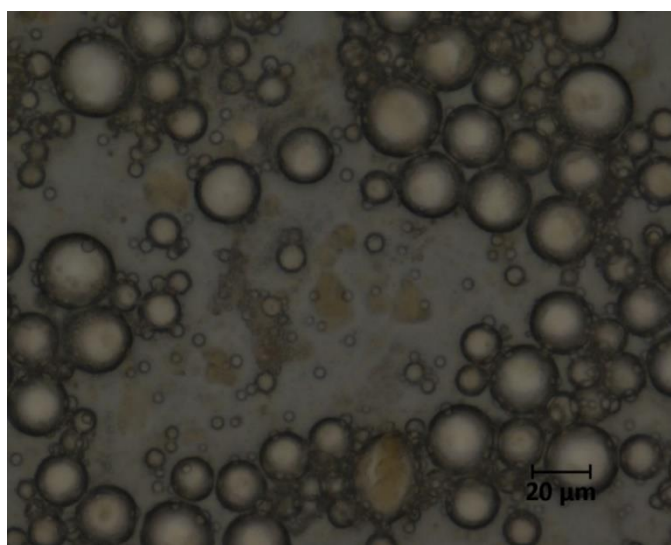

**Figure S6.** Optical microscopy images of BCP-GO in water-in-toluene emulsion

**Table S1.** Results of fluorescence lifetime decay measured at 393 nm for coumarin, 518 nm for fluorescein and 585 nm for rhodamine under irradiation at 370 nm. The data were fitted by a double exponential model using two different lifetimes of  $\tau_1$  and  $\tau_2$ .  $A_1$  and  $A_2$  are the normalized populations for lifetime  $\tau_1$  and  $\tau_2$ , respectively. The average  $\tau_{ave}$  is calculated using the equation  $\tau_{ave} = (A_1\tau_1 + A_2\tau_2)/(A_1 + A_2)$ .

| Emission (nm) | Temperature | $\tau_1$ (ns) | $A_1$ (%) | $\tau_2$ (ns) | $A_2$ (%) | $\tau_{ave}$ (ns) |
|---------------|-------------|---------------|-----------|---------------|-----------|-------------------|
| 393 nm        | 22 °C       | 1.29          | 95.93     | 4.38          | 4.07      | 1.42              |
| (Coumarin)    | 28 °C       | 0.42          | 97.33     | 4.18          | 2.67      | 0.54              |
| 518 nm        | 28 °C       | 1.99          | 45.41     | 4.76          | 54.59     | 3.50              |
| (Fluorescein) | 34 °C       | 1.47          | 64.13     | 4.66          | 35.87     | 2.62              |
| 585 nm        | 34 °C       | 1.51          | 94.48     | 2.74          | 5.52      | 1.57              |
| (Rhodamine B) | 42 °C       | 1.08          | 93.68     | 2.74          | 6.32      | 1.18              |
